## **Title**

Evaluating the Impact of Purifying Selection on Species-level Molecular Dating

## **Authors**

Chong He, Dan Liang, Peng Zhang\*

## **Address**

State Key Laboratory of Biocontrol, College of Ecology and Evolution, School of Life Sciences, Sun Yat-Sen University, Guangzhou, China

## **\*Corresponding Author**

*Peng Zhang. #434, School of Life Sciences, Sun Yat-Sen University, Higher Education Mega Center, Guangzhou 510006, China. Tel: 86-20-39332782; Email: alarzhang@gmail.com*

1    **Abstract**

2           The neutral theory of molecular evolution suggests that the constancy of the molecular  
3 clock relies on the neutral condition. Thus, purifying selection, the most common type of  
4 natural selection, could influence the constancy of the molecular clock, and the use of  
5 genes/sites under purifying selection may produce less reliable molecular dating results.  
6 However, in current practices of species-level molecular dating, some researchers prefer to  
7 select slowly evolving genes/sites to avoid the potential impact of substitution saturation.  
8 These genes/sites are generally under a strong influence of purifying selection. Here, from the  
9 data of 23 published mammal genomes, we constructed datasets under various selective  
10 constraints. We compared the differences in branch lengths and time estimates among these  
11 datasets to investigate the impact of purifying selection on species-level molecular dating. We  
12 found that as the selective constraint increases, terminal branches are extended, which  
13 introduces biases into the result of species-level molecular dating. This result suggests that in  
14 species-level molecular dating, the impact of purifying selection should be taken into  
15 consideration, and researchers should be more cautious with the use of genes/sites under  
16 purifying selection.

17

18

19    **Key words:** Purifying selection, molecular clock, neutral theory, molecular dating, rate of  
20 evolution.

## 21 **Introduction**

22       The foundation of molecular dating lies in the molecular clock phenomenon discovered  
23 in the 1960s (Margoliash 1963; Zuckerkandl and Pauling 1965). The theoretical population  
24 geneticist, Motoo Kimura, noted that the neutral theory can provide an explanation for the  
25 molecular clock phenomenon (Ohta and Kimura 1971; Kimura 1977; Takahata 1987; Ohta  
26 1992; Takahata 2007; Nei et al. 2010). This viewpoint about the molecular clock is based on a  
27 well-known conclusion of the neutral theory that the substitution rate under selective  
28 neutrality is expected to be equal to the mutation rate (Kimura 1983; Ohta 1992; Nei et al.  
29 2010).

30       First, neutral theory suggests that the rate constancy among branches relies on the neutral  
31 condition. The substitution rate under selective neutrality depends only on the mutation rate  
32 and is independent of the population size and the selection coefficient. If the mutation rate is  
33 similar among lineages, the substitution rate can be expected to be similar among lineages. In  
34 contrast, under natural selection, the substitution rate is related to the population size and the  
35 selection coefficient. Even if a constant mutation rate is assumed, the population size and the  
36 selection coefficient are unlikely to always be constant among the lineages. Hence, rates  
37 would vary substantially among lineages, influencing the rate constancy among branches  
38 (Ohta and Kimura 1971; Takahata 1987; Ohta 1992; Nei et al. 2010; Gaut et al. 2011).

39       Moreover, as noted by other researchers, neutral theory also implies that the rate  
40 constancy within a branch relies on the neutral condition (Phillips and Penny 2003; Ho and  
41 Larson 2006; Subramanian et al. 2009; Subramanian and Lambert 2011). In practice, we do  
42 not distinguish whether the observed genetic variations have been fixed or not in the

43 population; therefore, the "rate" that we refer is actually not equivalent to the substitution rate  
44 or the mutation rate (Ho et al., 2005; Subramanian and Lambert, 2012). Consider a pair of  
45 sequences. If the two sequences diverged in the very recent past, almost all the observed  
46 genetic variations are new mutations, such that the short-term rate is approximately equal to  
47 the mutation rate. However, if the two sequences diverged a long time ago, then almost all the  
48 observed genetic variations are mutations that have been fixed in the population  
49 (substitutions); thus, the long-term rate is approximately equal to the substitution rate. The  
50 "rate" undergoes a transition between the substitution rate and the mutation rate. Under  
51 selective neutrality, because the substitution rate is equal to the mutation rate, the long-term  
52 rate is equal to the short-term rate, and the "rate" is expected to be generally constant through  
53 time. Instead, under purifying selection, because the substitution rate under purifying  
54 selection is lower than the mutation rate, a phenomenon called the "time dependency of  
55 molecular rates" (TDMR) is expected: the "rate" decays as moving backward in time (Ho et  
56 al. 2005, 2015; Subramanian et al. 2009; Subramanian and Lambert 2011, 2012; Nicolaisen  
57 and Desai 2012; Ho 2014; Aiweesakun and Katzourakis 2015, 2016).

58 As described above, both the rate constancies among lineages and through time rely on  
59 the neutral condition. From this point of view, purifying selection — the most common type  
60 of natural selection— can be inferred as likely changing the pattern of the molecular clock,  
61 which may reduce the reliability of the result of molecular dating. In practices of  
62 species-level molecular dating, researchers have paid a great deal of attention to factors that  
63 might increase the uncertainty of the analysis, such as substitution saturation, the rate  
64 heterogeneity among sites and the uncertainty in fossil calibration (Brandley et al. 2011;

65 Nakatani et al. 2011; Zheng et al. 2011; Soubrier et al. 2012; Zhu et al. 2015; Angelis et al.  
66 2018). Among these factors, substitution saturation may be one of the most well-known  
67 issues. As substitution saturation could cause an underestimation of branch lengths, some  
68 researchers have proposed or adopted the selection of slowly evolving genes/sites (such as 1<sup>st</sup>  
69 and 2<sup>nd</sup> codon positions) to reduce the risk of being influenced by substitution saturation  
70 (Miya et al. 2010; Nakatani et al. 2011; dos Reis et al. 2012, 2014; Jarvis et al. 2014; Hu et al.  
71 2017; Liu et al. 2017). However, from the viewpoint of purifying selection, this data  
72 processing method leads to genes/sites under neutrality being excluded and genes/sites under  
73 strong impacts of purifying selection being retained. Hence, a need exists to examine whether  
74 purifying selection has an impact on species-level molecular dating.

75 Here, we used 2242 protein-coding genes in 23 published mammal genomes to  
76 investigate the impact of purifying selection on species-level molecular dating. We grouped  
77 the 2242 genes into 30 bins according to their overall selective constraints and  
78 compared the difference in branch lengths and time estimates among bins. Meanwhile, we  
79 also randomly sampled genes from the 2242 genes and compared the branch lengths and time  
80 estimates among different codon positions in these genes. Through these comparisons, we  
81 examined whether differences exist among the results of datasets under various selective  
82 constraints.  
83

## 84 **Methods**

85 We used the molecular dating program MCMCTree in the PAML package to perform  
86 divergence time estimation for the investigation. In the intermediate process (usedata=3),  
87 branch lengths would also be estimated by the program BaseML and written into a file named  
88 “out.BV” to facilitate the calculation of likelihood (Thorne et al. 1998; dos Reis and Yang  
89 2011). Since the inferred branch lengths are directly related to divergence time estimation,  
90 they were used to investigate the pattern of branch lengths. If the data are partitioned, more  
91 than one phylogram tree will be present in the out.BV file, and each tree corresponds to a  
92 partition. Specifically, if the data are partitioned by codon positions, three trees corresponding  
93 to the 1<sup>st</sup>, 2<sup>nd</sup> and 3<sup>rd</sup> codon positions, respectively, will be present in the out.BV file (dos Reis  
94 and Yang 2011).

95 We collected 2242 coding sequences (CDS) from 23 mammalian genomes (Figure 1) and  
96 grouped them into 30 bins according to their mean pairwise  $dN/dS$  ( $\omega$ ) values. The overall  
97 selective constraint of the bin is stronger when the  $\omega$  value is smaller. Within a bin, the  
98 selective constraint is 3<sup>rd</sup> positions < 1<sup>st</sup> positions < 2<sup>nd</sup> positions. We evaluated the impact of  
99 purifying selection through comparisons of different datasets. To make the branches and time  
100 estimates comparable among the different datasets, the following described analyses were  
101 performed with the same topology (see the topology in Figure 1). The comparisons among  
102 the bins were performed under 5 different schemes: using only 1<sup>st</sup> positions, using only 2<sup>nd</sup>  
103 positions, using only 3<sup>rd</sup> positions, using all sites of genes under concatenation and using all  
104 sites of genes under partitioning by codon positions. Meanwhile, we also compared different  
105 codon positions in randomly sampled genes (see an illustration in Figure 2).

106

107 *Obtaining and Filtering Coding Sequences (CDS)*

108 We selected 23 mammal species that represent major mammalian lineages for our study.

109 Based on previous studies, the divergence times among these species range from 5 Ma to 185

110 Ma (Meredith et al. 2011; dos Reis et al. 2012, 2014). A total of 14,526 mammal CDS

111 alignments were downloaded from the OrthoMaM database (Douzery et al. 2014). To

112 minimize the influence of missing data, we chose the CDS alignments that have sequences of

113 all the selected taxa for further analyses. The reason why we selected twenty-three rather than

114 all available mammal species is to obtain more genes that satisfy the above criteria.

115 Mitochondrial protein-coding genes were discarded. Mean pairwise  $dN/dS$  ( $\omega$ ) was used to

116 measure the overall selective constraint on a CDS. To calculate  $\omega$ , pairwise nonsynonymous

117 substitutions ( $dN$ ) and synonymous substitutions ( $dS$ ) were calculated by the CodeML

118 program in the PAML package (Yang 2007), and  $\omega$  was calculated as (mean  $dN$ )/(mean  $dS$ ).

119 For some CDS,  $\omega$  cannot be calculated because no site was retained or because no difference

120 existed in the retained sites after deleting the gaps; thus, they were excluded from analyses.

121 Finally, 2242 CDS alignments were retained for further analyses.

122

123 *Workflow of the Investigation*

124 We analyzed both relative branch lengths and the time estimates under different selective

125 constraints. The workflow of the investigation is shown in Figure 2. The 2242 CDS were

126 ranked by  $\omega$  and grouped into 30 bins. When  $\omega$  is small (under strong selective constraint),

127 the variable sites in the 2<sup>nd</sup> positions may not be sufficient to precisely estimate branch

128 lengths and divergence times; thus, in the grouping procedure, we made 30 bins with similar  
129 numbers of variable sites in the 2<sup>nd</sup> codon positions rather than making these bins with similar  
130 numbers of genes or informative sites.

131 First, we considered the effects of the gene and the codon position. We separated the 1<sup>st</sup>,  
132 2<sup>nd</sup>, and 3<sup>rd</sup> codon positions to perform the investigation. For each of the 30 bins, three  
133 phylogram trees and time trees were estimated based on the different codon positions.  
134 Correspondingly, three linear regressions were performed to detect the impact of purifying  
135 selection. Note that, although linear regressions were performed here, we did not suggest any  
136 linear relationship between  $x$  and  $y$ ; it was only used to detect whether a systematic impact  
137 exists. The  $p$ -value of the linear regression indicates the probability that the slope is zero, i.e.,  
138 the probability that the datasets fluctuate randomly around a constant value. Thus, if the  
139  $p$ -value is significantly small, it indicates the existence of a systematic impact.

140 Next, we combined all the codon positions together to compare the overall difference  
141 among bins. Considering the impact of partitioning scheme, the investigations were  
142 conducted under two different partitioning schemes: concatenating all sites as one partition  
143 (1P) and partitioning by codon position (3P). As mentioned in the beginning of the Methods,  
144 the time tree under the 3P scheme is based on the three phylogram trees (also the gradient  
145 vectors and Hessian matrix) that correspond to the three codon positions. These phylogram  
146 trees are same as what we investigated above. Thus, the pattern of the branch lengths for the  
147 3P scheme is exactly the same as what we investigated above, and no need exists to perform  
148 the same investigation. To summarize, for each of the 30 bins, one phylogram tree under the  
149 1P partitioning scheme and two time trees corresponding to the two partitioning schemes



150 were to be estimated in this part of investigation. Accordingly, only one linear regression was  
151 performed to detect the impact on the branch length, and two were performed to detect the  
152 impact on the time estimate.

153 Next, we randomly sampled 100 CDS from the 2242 CDS with 100 repetitions, and we  
154 investigated the behaviors of the different codon positions. For each repeat, we conducted  
155 five different treatments: using the 1<sup>st</sup> codon position, 2<sup>nd</sup> codon position, 3<sup>rd</sup> codon position,  
156 1<sup>st</sup> + 2<sup>nd</sup> codon positions and 1<sup>st</sup> + 2<sup>nd</sup> + 3<sup>rd</sup> codon positions. We compared the differences  
157 among these treatments. Correspondingly, in each repeat, 5 phylogram trees and time trees  
158 have to be estimated and compared.

159 We wrote Python scripts to implement these procedures. Alignments and tree files were  
160 parsed by Biopython to facilitate extracting sequences and branch length information (Cock  
161 et al. 2009; Talevich et al. 2012). Linear regressions were performed by the SciPy library to  
162 calculate regression equations and *p*-values (Millman and Aivazis 2011). Plots were drawn by  
163 matplotlib library (Hunter 2007). Details of the aforementioned procedures are described in  
164 the following sections.

165

### 166 *Estimation of Branch Lengths and Divergence Times*

167 The program MCMCTree in the PAML package was used in the present study (Yang and  
168 Rannala 2006; Rannala and Yang 2007; Yang 2007; dos Reis and Yang 2011). We used the  
169 approximate likelihood method (dos Reis and Yang 2011) following a step-by-step protocol  
170 written by the developers running the program. The gradient vector, Hessian matrix and  
171 branch lengths were inferred under the HKY85 +  $\Gamma_4$  by the program BaseML (Yang 2007)

172 with reference to a previous study, dos Reis et al. (2014). For all the datasets, the tree shown  
173 in Figure 1 was used as the reference topology. As mentioned above, the inferred branch  
174 lengths in this step were used to investigate the pattern of branch lengths. We additionally ran  
175 phylogenetic reconstruction program RAxML (Stamatakis 2014) without fixing topology to  
176 examine whether the result is an artefact caused by the mismatch between topology and data.

177 The divergence times were estimated in MCMCTree with setting “usedata” as 2 under  
178 the auto-correlated rate model (1,000,000 iterations; first 10% as burn-in). The shape  
179 parameter of gamma prior for the overall rates for genes (“rgene\_gamma”) was set as 2, and  
180 the gamma prior for rate drift (“sigma2\_gamma”) was set as G(1, 1). Divergence time  
181 estimations were run at least twice to test whether the MCMC had reached convergence.  
182 Time estimates among bins are comparable only if they have a “common starting point”.  
183 Note that under a reversible substitution model (e.g. HKY85, GTR), there is no way to know  
184 the distance between the root of the whole tree (the crown Mammalia) and the second basal  
185 node (the crown Theria) just based on the molecular data (i.e. Felsenstein's “pulley principle”)  
186 (Felsenstein 1981). If we calibrate only the root of the tree, the time of the second basal node  
187 can be varied among datasets. However, such a variation is irrelevant to the factor that we are  
188 interested in (the relative branch length). Therefore, to set a “common starting point”, the  
189 second basal node (or in another word, the root of the in-group) needs to be calibrated  
190 (similar rationale can be seen in Thorne et al., 1998). We calibrated the root and the second  
191 basal node with tightly constraints  $>1.8579 < 1.8581$  and  $>1.7019 < 1.7021$ . They were  
192 according to the estimated divergence times of (dos Reis et al. (2014). This calibration  
193 scheme forces the time estimates of the root and the second basal node to be nearly identical

194 among datasets, thus providing a “common starting point”. Under this calibration scheme the  
195 time estimates of the other 20 nodes are comparable; and we did not calibrate any other node,  
196 thus the influence of the change in relative branch lengths can be shown in the maximum  
197 extent.

198

### 199 *Measures of the Relative Branch Length and Branch Variation*

200 We used the ratio of the sum of the terminal branch lengths to the sum of the internal  
201 branch lengths ( $SumT/SumI$ ) to measure the overall relative length of terminal branches,

$$SumT/SumI = \frac{\sum \text{terminal branch lengths}}{\sum \text{internal branch lengths}}.$$

202 The ratio of each terminal branch length to the sum of internal branch lengths ( $T/SumI$ )  
203 was used to measure the relative length of each terminal branch,

$$T/SumI = \frac{\text{terminal branch length}}{\sum \text{internal branch lengths}}.$$

204 We used the coefficient of variation (CV) of node-to-tip distances to study the impact on  
205 rate heterogeneity.

$$CV = \text{standard deviation}/\text{mean} = \frac{\sum_{i=1}^N |b_i - \bar{b}|}{\sqrt{(N-1)}} / \bar{b},$$

206 where  $N$  is the number of lineages,  $b_i$  is the distance from the tip of  $i$ -th lineage to the node  
207 of the most recent common ancestor (MRCA) of the  $N$  lineages,  $\bar{b}$  is the mean of node-to-tip  
208 distances,  $\bar{b} = \frac{1}{N} \sum_{i=1}^N b_i$ .

209

## 210 **Results and Discussion**

211 *The Change in the Branch Length as the Selective Constraint Becomes Stronger*

212 In species-level molecular dating, the role of sequence data is to provide information  
213 about genetic distances (branch lengths) (dos Reis et al. 2016). Therefore, we first show the  
214 pattern of the relative branch lengths among the different bins. To visually display our  
215 observations, the branch lengths inferred from three representative bins are given in Figure 3:  
216 (1) bin #1, under the most relaxed selective constraint ( $\omega = 0.48$ ); (2) bin #17, under a  
217 moderate selective constraint ( $\omega = 0.12$ ); and (3) bin #30, under the most rigid selective  
218 constraint ( $\omega = 0.01$ ). Let us start with the 3<sup>rd</sup> positions of bin #1, which is under the most  
219 relaxed selective constraint. We use an indicative node, Catarrhini (including human,  
220 chimpanzee, gorilla, orangutan, baboon, macaque and green monkey), to help us clarify our  
221 observation. For the 3<sup>rd</sup> positions of bin #1, the node-to-tip distances for Catarrhini were  
222 similar, showing relatively constant rates for this group. Additionally, for all the codon  
223 positions of bin #1 and for 3<sup>rd</sup> codon positions among the three representative bins, the shapes  
224 of the trees were similar (Figure 3). This pattern is consistent with the rate constancy under  
225 the neutral condition, which has been highlighted by a series of early studies. As the selective  
226 constraint becomes stronger, the shapes of the trees became distorted. As one of the  
227 signatures of the distortion, the variation among the node-to-tip distances for crown  
228 Catarrhini became increasingly large (from the lower left to the upper right in Figure 3). To  
229 show the observation more quantitatively, we performed linear regressions for the three kinds  
230 of codon positions with the coefficient of variation (CV) of node-to-tip distances for crown  
231 Catarrhini as the scalar response ( $y$ ) and the  $\omega$  of the corresponding dataset as the explanatory  
232 variable ( $x$ ). For the 3<sup>rd</sup> positions, the CV was quite similar across bins; however, for the 1<sup>st</sup>  
233 and 2<sup>nd</sup> positions, we found that as  $\omega$  decreased, the CV increases (slope > 0), and the trend of

234 the 2<sup>nd</sup> positions has a larger slope value than that of the 1<sup>st</sup> positions (Figure S1). This pattern  
235 seems to be consistent with the idea that the existence of natural selection can increase the  
236 rate heterogeneity among the lineages (Ohta and Kimura 1971; Ohta 1992; Gaut et al. 1996).

237 The distortions of trees did not just show a pattern in which the branches of some  
238 lineages were lessened and those of others were extended. Instead, we noted that, as the  
239 selective constraint became stronger, almost all the terminal branches became relatively  
240 extended (they were lessened in terms of the absolute value). For each lineage, we performed  
241 linear regressions with the ratio of the length of each terminal branch to the sum of all  
242 internal branch lengths ( $T/SumI$ ) as the scalar response ( $y$ ) and  $\omega$  as the explanatory variable  
243 ( $x$ ). We found that for the 1<sup>st</sup> and 2<sup>nd</sup> codon positions, all the trends had positive slopes  
244 (Figure 4; with exceptions that  $p > 0.05$  for both 1<sup>st</sup> and 2<sup>nd</sup> positions in mouse, and for 1<sup>st</sup>  
245 positions in chimpanzee and wallaby). The existence of such a large proportion of terminal  
246 branches showing positive slope values in the linear regressions is statistically significant (see  
247 Supplementary Methods and Table S1). Hence, the observed extension of the terminal  
248 branches is unlikely due to chance or lineage-specific adaptations. Additionally, we  
249 performed linear regressions with the ratio of the sum of terminal branch lengths to the sum  
250 of internal branch lengths ( $SumT/SumI$ ) as the scalar response ( $y$ ) and  $\omega$  as the explanatory  
251 variable ( $x$ ). For 3<sup>rd</sup> positions,  $SumT/SumI$  values were generally similar among the 30 bins.  
252 For both 1<sup>st</sup> and 2<sup>nd</sup> codon positions,  $SumT/SumI$  values increased significantly as  $\omega$   
253 decreased (slope  $> 0$ ,  $p < 0.05$ ), and the trend for the 2<sup>nd</sup> positions has a larger slope value  
254 than that of the 1<sup>st</sup> positions (Figure 4). This pattern remained stable when trees were  
255 estimated by the phylogenetic reconstruction program RAxML without fixing the topology

256 (Figure S2). Thus, the extension of the terminal branches is also unlikely to be due to the  
257 mismatch between the topology and data.

258

### 259 *The Change in the Time Estimate as the Selective Constraint Becomes Stronger*

260 Next, we show the pattern of time estimates. Time estimates among datasets can be  
261 comparable only if they share a "common starting point". We calibrated the root of the  
262 in-group with tight constraints (based on the result of a previous study) (dos Reis et al., 2014)  
263 to force the time estimate for this node to be nearly identical among datasets, thus providing a  
264 "common starting point" (see Methods). Under this calibration scheme, the divergence times  
265 of the other 20 nodes were estimated and compared (note that the branch length estimation is  
266 independent of the calibration scheme; regardless of which calibration scheme is adopted, the  
267 above pattern of branch lengths holds).

268 The most marked effect on the time estimate is correlated with the extension of the  
269 terminal branches. Overall, the time estimates based on the 1<sup>st</sup> and 2<sup>nd</sup> codon positions  
270 become older as  $\omega$  decreased, and the trends for the 2<sup>nd</sup> codon positions had larger slope  
271 values than those for the 1<sup>st</sup> codon positions; whereas, for the 3<sup>rd</sup> positions, the time estimates  
272 were similar among the different bins (Figure 5; see representative time trees in Figure S3).  
273 For the 2<sup>nd</sup> codon positions, all the nodes showed regression trends with positive slope values  
274 ( $p < 0.05$  in binominal test, see Supplementary Methods and Table S2), 16 of which showed  
275 statistical significances; and the other 4 nodes that did not show statistical significance were  
276 older than 90 Ma. For the 1<sup>st</sup> codon position, 18 of the 20 nodes showed regression trends  
277 with positive slope values ( $p < 0.05$  in binominal test, see Supplementary Methods and Table

278 S2), 11 of which showed statistical significances; the other 9 nodes that did not show  
279 statistical significance were older than 80 Ma.

280 The impact on the time estimate was more pronounced for shallow-scale nodes than  
281 deep-scale nodes (Figure S4). For example, for crown Primates (node 4, Figure 5; a  
282 deep-scale node), the time estimate of the 2<sup>nd</sup> positions in bin #30 was 12.27% older than of  
283 the 3<sup>rd</sup> positions in bin #1 (102.29 Ma vs. 91.11 Ma), while, for the crown Papionini (node 10,  
284 Figure 5; a shallow-scale node), the time estimate of the 2<sup>nd</sup> position in bin #30 was 407%  
285 older than that of the 3<sup>rd</sup> position in bin #1 (70.28 Ma vs. 13.86 Ma). These results, combined  
286 with the above results for branch lengths, show that the extended terminal branches can “push”  
287 the time estimates to be older as the selective constraint becomes stronger. Accordingly,  
288 purifying selection can influence the result of species-level molecular dating.

289

#### 290 *The Change in the Branch Length and the Time Estimate When Using All Sites of Genes*

291 In the above analyses, the three codon positions were separated for each bin. It is also  
292 worth investigating the overall behaviors of bins using all the three codon positions of genes.  
293 Here, we compared the 30 bins with using all the three codon positions together. As different  
294 codon positions are involved, a consideration of the impact of partitioning scheme is required.  
295 Thus, we conducted the comparison of time estimates under two treatments: concatenating all  
296 sites as one partition and partitioning the data into three partitions according to codon  
297 positions (see Methods and Figure 2). Note that with partitioning by codon positions, the time  
298 tree is based on the branch lengths of the three phylogram trees that correspond to the three  
299 codon positions (see Methods). For these trees, we have already analyzed and discussed

300 above. In this part of investigation there is no need to discuss this result again, thus the  
301 investigation of branch lengths was performed only for the 1P scheme.

302 Let us start with the result for the 1P scheme, where each bin corresponds to a single  
303 phylogram tree and the time tree is based on this tree. We found that when all sites were  
304 concatenated as one partition,  $SumT/SumI$  values of bins also showed an increasing trend as  
305  $\omega$  decreased, but the slope value was small (Figure 6, upper), suggesting a modest impact of  
306 purifying selection. Consistent with the pattern of branch lengths, time estimates under 1P  
307 scheme also showed some increases as  $\omega$  decreased (Figure 6). For 19 out of the 20 nodes,  
308 the slope values were positive ( $p < 0.05$  in binomial test, see Supplementary Methods and  
309 Table S2). Nevertheless, the difference in time estimates among bins were modest (see  
310 representative time trees in Figure S5). The regression trends had smaller slope values than  
311 the trends for 1<sup>st</sup> and 2<sup>nd</sup> codon positions and only 7 nodes showed statistical significances  
312 (Figure 6). With a consideration of the neutral theory, this result seems to be not surprising.  
313 As suggested by the neutral theory, in general, most of the observed genetic variations are  
314 selectively neutral (Kimura 1968, 1977; Ohta 1992; Nei et al. 2010). Without artificial  
315 manipulation, neutral substitutions (majorly from 3<sup>rd</sup> positions) are expected to be the major  
316 contributors for the branch length. Hence, the overall behavior of a gene should be similar to  
317 that of its 3<sup>rd</sup> positions, differences among bins would not be substantial.

318 Nevertheless, under the 3P scheme the pattern became different. We found that under the  
319 3P scheme, as  $\omega$  decreased the time estimates showed much more prominent increases than  
320 under 1P scheme (see representative time trees in Figure S5). The regression trends had larger  
321 slope values than the trends under 1P scheme and all the regression trends showed positive



322 slope values and had statistical significances (Figure 6, Table S2 and Supplementary  
323 Methods). The pattern under 3P scheme is more similar to that of 1<sup>st</sup> and 2<sup>nd</sup> positions rather  
324 than that of 3<sup>rd</sup> positions. The mechanism behind this result could be complicated. But one  
325 thing should be noted here: in the algorithm of molecular dating, the divergence times of  
326 different partitions are assumed to fluctuate up and down randomly around a “true tree”  
327 (Thorne and Kishino 2002; Yang and Rannala 2006; dos Reis and Yang 2011). According to  
328 the above results, this assumption is violated under purifying selection. The impact of  
329 purifying selection may thus be strengthened.

330 In summary, when all sites of genes are used together, the impact of purifying selection  
331 can also be detectable. The strength of the impact of purifying selection depends on the  
332 partition scheme. Under concatenating all sites as one partition, the differences among bins  
333 are small, the impact of purifying selection is generally modest. While, under partitioning by  
334 codon position, the differences among bins become substantial, the impact of purifying  
335 selection is strengthened. Rate heterogeneity among codon positions is usually larger than  
336 that among genes. Some researchers would partition the data by codon position to  
337 accommodate such rate heterogeneity (Yang and Rannala 2006; Brandley et al. 2011; Shen et  
338 al. 2016; Liu et al. 2017; Angelis et al. 2018; Morris et al. 2018). Nevertheless, considering  
339 the impact of purifying selection, this partitioning strategy could be problematic. We suggest  
340 researchers being more cautious about this method in future.

341

342 *The Result of the Comparison among Different Codon Positions in Randomly Sampled Genes*

343 In species-level molecular dating practices, the removal of the 3<sup>rd</sup> codon positions and

344 use only the 1<sup>st</sup> and 2<sup>nd</sup> codon positions are common to avoid the potential impact of  
345 substitution saturation. However, the sites at the 1<sup>st</sup> and 2<sup>nd</sup> codon positions are typically  
346 under stronger purifying selection. To evaluate the influence of such a practice, we generated  
347 100 randomly sampled datasets, each of which contained 100 CDS from the 2242 CDS. For  
348 each dataset, we estimated the branch lengths and divergence times by using only the 1<sup>st</sup>  
349 codon positions, only the 2<sup>nd</sup> codon positions, only the 3<sup>rd</sup> codon positions, 1<sup>st</sup> + 2<sup>nd</sup> positions  
350 and all sites. In all the 100 randomly sampled datasets, the *SumT/SumI* values were as follows:  
351 the 2<sup>nd</sup> position > 1<sup>st</sup> + 2<sup>nd</sup> positions > 1<sup>st</sup> position > all sites > 3<sup>rd</sup> position (Figure 7, upper),  
352 and all pairwise comparisons showed statistical significance (Supplementary Methods, Table  
353 S2). Correspondingly, the mean time estimates of the 20 nodes were as follows: the 2<sup>nd</sup>  
354 position > 1<sup>st</sup> + 2<sup>nd</sup> positions > 1<sup>st</sup> position > all sites > 3<sup>rd</sup> position. The time estimates based  
355 on the 3<sup>rd</sup> position were consistently the youngest, the time estimates were older under the  
356 stronger selective constraint of the dataset (Figure 7), and all the pairwise comparisons  
357 showed statistical significance (see Supplementary Methods, Table S3). Specifically, for the  
358 widely adopted practice of using 1<sup>st</sup> + 2<sup>nd</sup> positions, nodes not older than 40 Ma could  
359 produce ~ 20% to 50% older time estimates than those determined by using all sites. Hence,  
360 for practices such as using the 1<sup>st</sup> + 2<sup>nd</sup> positions, the impact of purifying selection should not  
361 be neglected.

362

### 363 *The Possible Cause of the Extension of the Terminal Branches*

364 Finding an explanation for the extension of the terminal branches is helpful to better  
365 understand the impact of purifying selection. In species-level molecular dating, researchers

366 generally equate the "rate" with the substitution rate. The substitution rate depends on the  
367 mutation rate, population size and selection coefficient. With this perspective of thinking,  
368 only if one of the above factors undergoes a kind of consistent change in all terminal  
369 branches, and such a kind of change depends on the selective constraint, the observed pattern  
370 could be expected. This situation is unlikely to happen. Thus, a change to this way of thinking  
371 is necessary.

372 By acknowledging that the "rate" is not equivalent to the substitution rate, the extension  
373 of the terminal branches can be explained naturally. Recall that the TDMR caused by  
374 purifying selection mentioned in Introduction, where the "rate" under purifying selection  
375 undergoes a transition from the mutation rate to the lower substitution rate moving backward  
376 in time. Moving forward in time, the TDMR caused by purifying selection is equivalent to a  
377 rate elevation. When mapped to a tree, this rate elevation extends terminal branches relative  
378 to the internal branches (Figure 8). When a certain node is calibrated, the extended terminal  
379 branches would "push" the time estimates of its descendant nodes to be older (Phillips, 2009).  
380 As the selective constraint becomes stronger, the substitution rate is increasingly reduced,  
381 while, the mutation rate is generally unaffected. Thus, the disparity between the substitution  
382 rate and the mutation rate increases, and the rate elevation is more severe. Therefore, as the  
383 selective constraint becomes stronger, the extension of the terminal branches strengthens  
384 more severely, and the overestimation of the time estimates also worsens, as we have seen in  
385 the above results (Figure 8).

386 Can other factors lead to the extension of the terminal branches? First, we consider  
387 factors other than purifying selection that have been proposed to explain the TDMR pattern

388 (Ho et al. 2005; Soubrier et al. 2012; dos Reis and Yang 2013). Note that, being able to  
389 explain the TDMR pattern does not directly mean being able to explain the extension of the  
390 terminal branches. Substitution saturation is one of factors that have been proposed to explain  
391 the TDMR. Substitution saturation can lead to an underestimation of branch lengths. As the  
392 distance between the sequences grows, substitution saturation tends to be more severe; thus,  
393 as the distance between the sequences grows, underestimation of branch lengths becomes  
394 more severe leading to the TDMR pattern (Ho et al. 2005, 2011). Now, let us consider if it  
395 can explain the extension of the terminal branches. Fast evolving genes are more easily  
396 influenced by substitution saturation than slowly evolving genes, as the fast evolving  
397 genes/sites are more divergent than slowly evolving genes/sites. Hence, from the viewpoint  
398 of substitution saturation, *SumI* is expected to be underestimated most seriously for the  
399 fastest-evolving dataset; the fastest-evolving dataset has the largest *SumT/SumI* value, and the  
400 slowest-evolving dataset has the smallest *SumT/SumI* value. However, the pattern that we  
401 observed in reality is opposite of this situation: the fastest-evolving dataset (3<sup>rd</sup> positions of  
402 bin #1) had the smallest *SumT/SumI* value, and the slowest-evolving dataset (2<sup>nd</sup> positions of  
403 bin #30) had the largest *SumT/SumI* value. Moreover, when using Xia's tests (Xia et al. 2003),  
404 we could not detect a significant impact of substitution saturation, even for the  
405 fastest-evolving dataset (Table S4). Therefore, substitution saturation is unlikely to be the  
406 cause behind the extension of the terminal branches.

407 With a similar rationale, we can exclude other factors, such as selection heterogeneity  
408 among sites(dos Reis and Yang 2013) and rate heterogeneity among sites (Soubrier et al.  
409 2012). Similar to substitution saturation, these factors can also lead to underestimation of the

410 branch lengths. As the underestimation of branch lengths is more serious for distantly  
411 divergent sequences, a TDMR pattern can be expected (Soubrier et al. 2012; dos Reis and  
412 Yang 2013). Again, fast evolving genes are more divergent than slowly evolving genes.  
413 Therefore, for these factors, patterns opposite to the reality are expected: the fastest-evolving  
414 dataset has the largest *SumT/SumI* value, and the slowest-evolving dataset has the smallest  
415 *SumT/SumI* value. Besides, mitigating the rate heterogeneity or selection heterogeneity  
416 among sites can actually aggravate the extension of the terminal branches. Take bin #30 as an  
417 example. The 3<sup>rd</sup> positions of bin #30 has a rate approximately 10 times that of the 2<sup>nd</sup>  
418 positions. Some rate heterogeneity or selection heterogeneity is apparent in bin #30. As  
419 mentioned above, concatenating all sites of bin #30 as one partition did not show a prominent  
420 extension of the terminal branches. In comparison, using only the 2<sup>nd</sup> position would make  
421 the dataset less heterogeneous, which did not alleviate the extension of the terminal branches  
422 but, instead, aggravated it. Thereby, selection heterogeneity among sites and rate  
423 heterogeneity among sites are also unlikely to explain the extension of the terminal branches.  
424 Additionally, we investigated whether some other factors can explain the extension of the  
425 terminal branches (see Supplementary Methods). First, we analyzed whether the relative  
426 composition variability (RCV) can explain the extension of the terminal branches (Phillips  
427 and Penny 2003). We investigated the correlation between RCV and  $\omega$ . We found that the  
428 RCV value is negatively correlated with  $\omega$  (Figure S6A, left). However, when we regrouped  
429 the 2242 coding sequences into 30 bins by RCV values, the branch length patterns for the  
430 three codon positions (Figure S6A, right) were different from those in Figure 4. Thus, RCV is  
431 unlikely to be responsible for the extension of the terminal branches. Additionally, we

432 analyzed whether the GC content can explain the extension of the terminal branches. We  
433 investigated the correlation between the mean GC content of gene and  $\omega$ . We found that the  
434 mean GC content is positively correlated to  $\omega$  (Figure S6B, left). When we regrouped the  
435 2242 CDS into 30 bins by GC content, although we observed a pattern slightly homologous  
436 to the extension of the terminal branches (Figure S6B, right), that pattern is far less prominent  
437 than the pattern that we have shown above (Figure 4). Thus, the GC content is also unlikely  
438 to be responsible for the extension of the terminal branches. Gene tree discordance can also  
439 influence the inference of branch lengths (Mendes and Hahn 2016). However, gene tree  
440 discordance is expected to influence the length of the whole tree rather than just terminal  
441 branches or internal branches. Furthermore, this impact is generally modest. Thus, gene tree  
442 discordance seems also to be implausible for explaining the extension of the terminal  
443 branches. For now, the TDMR caused by purifying selection seems to be a more reasonable  
444 explanation for the extension of the terminal branches rather than other factors.

445 In an influential study about TDMR, Ho et al. (2005), the authors depicted trends of rates  
446 against time for three cases: mitochondrial protein-coding genes of avian taxa, mitochondrial  
447 protein-coding genes of primates and D-loop sequences of primates. In Ho et al. (2005), the  
448 authors claimed that the TDMR trends reached plateaus before 2 Ma. According to Ho et al.  
449 (2005), the TDMR caused by purifying selection seems not able to influence the deep time  
450 scales involved in the present study. However, due to the limited data size, large uncertainties  
451 remain in the result of Ho et al. (2005), the point of reaching the plateau can be also 5, 6, or  
452 even 10 Ma (Woodhams 2005). More importantly, the result of Ho et al. (2005) was based on  
453 all sites of genes. In the present study, when concatenating all sites of genes as one partition,

454 the extension of the terminal branches is actually not prominent. Nevertheless, the time depth  
455 that is influenced by the TDMR caused by purifying selection depends on the selective  
456 constraint. In a previous study, Subramanian and Lambert (2011), the authors compared the  
457 TDMR trends of the nonsynonymous data and the synonymous data for mitochondrial genes  
458 of humans and chimpanzees. For the synonymous data, before 10 Ma, the trend had reached  
459 the plateau, whereas for nonsynonymous data, until 10 Ma, the trend had not yet reached the  
460 plateau. This result suggests that the stronger the selective constraint is, the greater time depth  
461 is influenced by the TDMR caused by purifying selection. Hence, simply from studies based  
462 on sites under the average selective constraint, we should not conclude that the TDMR  
463 caused by purifying selection cannot influence species-level molecular dating. Moreover, the  
464 result of Ho et al. (2005) was based on mitochondrial genes. Mitochondrial genomes have  
465 smaller effective population sizes than nuclear genomes. The fixation time for mitochondrial  
466 genes is expected to be shorter than nuclear genes. Thus, purifying selection could influence a  
467 deeper timescale for nuclear genes than for mitochondrial genes. Attributing the extension of  
468 the terminal branches to the TDMR caused by purifying selection is not conflict with the  
469 existing empirical evidences.

470 However, the theoretical studies based on the Wright-Fisher model suggest that large  
471 effective population sizes are required to explain the TDMR pattern observed in Ho et al.  
472 (2005) by purifying selection alone (Woodhams 2005; O'Fallon 2010). There exist a disparity  
473 between the theoretical evidences and the empirical evidences. Thus, finding a perfect  
474 explanation for the extension of the terminal branches seems to be a puzzle. In spite of this,  
475 as discussed above, the TDMR caused by purifying selection shows a different explanatory

476 ability for the extension of the terminal branches, using other factors to explain why the  
477 extension of terminal branches depends on the selective constraint is difficult. Hence, on  
478 present evidence, the TDMR caused by purifying selection seems, at least, to be an important  
479 contributor to the extension of the terminal branches.

480

#### 481 *The Implication for Molecular Dating Practices*

482 In this study, we observed that, as the selective constraint becomes stronger, terminal  
483 branches are relatively extended. Although it is difficult to find a perfect explanation for this  
484 result, the result itself implies that purifying selection has an impact on species-level  
485 molecular dating. In population-level molecular dating, some researchers have suggested  
486 using selectively neutral genes/sites to avoid the impact of purifying selection (Subramanian  
487 et al. 2009; Subramanian and Lambert 2011, 2012). Similarly, for the species-level case in  
488 this study, such a method should also be recommended.

489 On the other hand, as mentioned in the Introduction, in current practices of species-level  
490 molecular dating, researchers would like to select slow-evolving genes/sites to reduce the  
491 impact of substitution saturation. These researchers may believe that the only disadvantage of  
492 excluding fast-evolving genes/sites is the reduction of the information content; no bias would  
493 be introduced by this method. From this perspective, if the dataset is large enough, the  
494 selection of slow-evolving genes/sites seems to be more elaborate and reliable (dos Reis et al.  
495 2012; Jarvis et al. 2014). In the present study, from the result of the 1P scheme in Figure 6  
496 and the comparison among the 3<sup>rd</sup> position and all sites in the randomly sampled genes  
497 (Figure 7), we can see that if we do not intentionally select some genes/sites, purifying



498 selection would not dramatically influence the time estimate in the species-level molecular  
499 dating. However, the selection of slow-evolving genes/sites can strengthen the impact of  
500 purifying selection. In extremes, the impact of purifying selection can be strengthened so  
501 much that it biases the time estimate dramatically (e.g., the result based on the 2<sup>nd</sup> position of  
502 the slowest genes). If one prefers to select slowly evolving gene/sites, the result could be  
503 misleading. Thus, the opinion that selecting slow-evolving genes/sites cause no harm to the  
504 accuracy of species-level molecular dating may need to be reconsidered.

505       Nevertheless, our study does not mean that there is no need to avoid substitution  
506 saturation. It is reasonable to remove those genes/sites with exceptionally fast rates from data  
507 because the fast rates of these genes/sites may result from positive selection or mutational  
508 hotspots (Pisani 2004; Zheng et al. 2004). Additionally, in some cases, such as using  
509 mitochondrial genes or/and estimating highly deep divergences, selecting genes/sites under  
510 relaxed selective constraints may increase the risk of being influenced by substitution  
511 saturation, and using those genes/sites with slower rates may be more reasonable. Hence,  
512 through considering the impact of purifying selection, a question is raised: How can a  
513 trade-off be made between avoiding purifying selection and avoiding substitution saturation?  
514 Further studies are required to address this question. With further studying of this question in  
515 the future, researchers may be able to get more reliable results in species-level molecular  
516 dating. All in all, in species-level molecular dating, the impact of purifying selection should  
517 not be neglected.

## References

- Aiewsakun P, Katzourakis A. 2015. Time dependency of foamy virus evolutionary rate estimates. *BMC Evol Biol.* 15:1–15.
- Aiewsakun P, Katzourakis A. 2016. Time-dependent rate phenomenon in viruses. *J Virol.* 90:7184–7195.
- Angelis K, Álvarez-Carretero S, dos Reis M, Yang Z. 2018. An evaluation of different partitioning strategies for Bayesian estimation of species divergence times. *Syst Biol.* 67:61–77.
- Arbogast BS, Edwards S V, Wakeley J, Beerli P, Slowinski JB. 2002. Estimating divergence times from molecular data on phylogenetic and population genetic timescales. *Annu Rev Ecol Syst.* 33:707–740.
- Bousquet J, Strauss SH, Doerksen AH, Price RA. 1992. Extensive variation in evolutionary rate of *rbcL* gene sequences among seed plants. *Proc Natl Acad Sci.* 89:7844–7848.
- Brandley MC et al. 2011. Accommodating heterogeneous rates of evolution in molecular divergence dating methods: an example using intercontinental dispersal of Pleistodon (Eumeces) lizards. *Syst Biol.* 60:3–15.
- Cock PJA et al. 2009. Biopython: freely available Python tools for computational molecular biology and bioinformatics. *Bioinformatics.* 25:1422–1423.
- Douzery EJP et al. 2014. OrthoMaM v8: A database of orthologous exons and coding sequences for comparative genomics in mammals. *Mol Biol Evol.* 31:1923–1928.
- Felsenstein J. 1981. Evolutionary trees from DNA sequences: a maximum likelihood approach. *J Mol Evol.* 17:368–376.

- Gaut BS, Morton BR, McCaig BC, Clegg MT. 1996. Substitution rate comparisons between grasses and palms: synonymous rate differences at the nuclear gene *Adh* parallel rate differences at the plastid gene *rbcL*. *Proc Natl Acad Sci.* 93:10274–10279.
- Gaut BS, Muse S V., Clark WD, Clegg MT. 1992. Relative rates of nucleotide substitution at the *rbcL* locus of monocotyledonous plants. *J Mol Evol.* 35:292–303.
- Gaut BS, Yang L, Takuno S, Eguiarte LE. 2011. The patterns and causes of variation in plant nucleotide substitution rates. *Annu Rev Ecol Evol Syst.* 42:245–266.
- Ho SYW et al. 2011. Time-dependent rates of molecular evolution. *Mol Ecol.* 20:3087–3101.
- Ho SYW. 2014. The changing face of the molecular evolutionary clock. *Trends Ecol Evol.* 29:496–503.
- Ho SYW, Duchêne S, Molak M, Shapiro B. 2015. Time-dependent estimates of molecular evolutionary rates: evidence and causes. *Mol Ecol.* 24:6007–6012.
- Ho SYW, Larson G. 2006. Molecular clocks: when times are a-changin'. *Trends Genet.* 22:79–83.
- Ho SYW, Phillips MJ, Cooper A, Drummond AJ. 2005. Time dependency of molecular rate estimates and systematic overestimation of recent divergence times. *Mol Biol Evol.* 22:1561–1568.
- Hu Y et al. 2017. Comparative genomics reveals convergent evolution between the bamboo-eating giant and red pandas. *Proc Natl Acad Sci.* 114:1081–1086.
- Hunter JD. 2007. Matplotlib: A 2D Graphics Environment. *Comput Sci Eng.* 9:90–95.
- Jarvis ED et al. 2014. Whole-genome analyses resolve early branches in the tree of life of modern birds. *Science.* 346:1320–1331.

- Kimura M. 1968. Evolutionary rate at the molecular level. *Nature*. 217:624–626.
- Kimura M. 1977. Preponderance of synonymous changes as evidence for the neutral theory of molecular evolution. *Nature*. 267:275–276.
- Kimura M. 1983. *The neutral theory of molecular selection*. New York, NY: Cambridge University Press.
- Kumar S, Subramanian S. 2002. Mutation Rates in Mammalian Genomes. *Proc Natl Acad Sci*. 99:803–808.
- Liu L et al. 2017. Genomic evidence reveals a radiation of placental mammals uninterrupted by the KPg boundary. *Proc Natl Acad Sci*. 114:E7282–E7290.
- Margoliash E. 1963. Primary structure and evolution of cytochrome C. *Proc Natl Acad Sci*. 50:672–679.
- Mendes FK, Hahn MW. 2016. Gene tree discordance causes apparent substitution rate variation. *Syst Biol*. 65:711–721.
- Meredith RW et al. 2011. Impacts of the Cretaceous Terrestrial Revolution and KPg extinction on mammal diversification. *Science*. 334:521–524.
- Millman KJ, Aivazis M. 2011. Python for scientists and engineers. *Comput Sci Eng*. 13:9–12.
- Miya M et al. 2010. Evolutionary history of anglerfishes (Teleostei: Lophiiformes): a mitogenomic perspective. *BMC Evol Biol*. 10:58.
- Morris JL et al. 2018. The timescale of early land plant evolution. *Proc Natl Acad Sci*. 115:E2274–E2283.
- Muse S V., Gaut BS. 1997. Comparing patterns of nucleotide substitution rates among chloroplast loci using the relative ratio test. *Genetics*. 146:393–399.

- Nakatani M, Miya M, Mabuchi K, Saitoh K, Nishida M. 2011. Evolutionary history of Otophysi (Teleostei), a major clade of the modern freshwater fishes: Pangaeian origin and Mesozoic radiation. *BMC Evol Biol.* 11:177.
- Nei M, Suzuki Y, Nozawa M. 2010. The neutral theory of molecular evolution in the genomic Era. *Annu Rev Genomics Hum Genet.* 11:265–289.
- Nicolaisen LE, Desai MM. 2012. Distortions in genealogies due to purifying selection. *Mol Biol Evol.* 29:3589–3600.
- O’Fallon BD. 2010. A Method to Correct for the Effects of Purifying Selection on Genealogical Inference. *Mol Biol Evol.* 27:2406–2416.
- Ohta T. 1992. The nearly neutral theory of molecular evolution. *Annu Rev Ecol Syst.* 23:263–286.
- Ohta T, Kimura M. 1971. On the constancy of the evolutionary rate of cistrons. *J Mol Evol.* 1:18–25.
- Phillips MJ. 2009. Branch-length estimation bias misleads molecular dating for a vertebrate mitochondrial phylogeny. *Gene.* 441:132–140.
- Phillips MJ, Penny D. 2003. The root of the mammalian tree inferred from whole mitochondrial genomes. *Mol Phylogenet Evol.* 28:171–185.
- Pisani D. 2004. Identifying and removing fast-evolving sites using compatibility analysis: an example from the Arthropoda. *Syst Biol.* 53:978–989.
- Rannala B, Yang Z. 2007. Inferring speciation times under an episodic molecular clock. *Syst Biol.* 56:453–466.
- dos Reis M et al. 2012. Phylogenomic datasets provide both precision and accuracy in

- estimating the timescale of placental mammal phylogeny. *Proc R Soc B Biol Sci.* 279:3491–3500.
- dos Reis M, Donoghue PCJ, Yang Z. 2016. Bayesian molecular clock dating of species divergences in the genomics era. *Nat Rev Genet.* 17:71–80.
- dos Reis M, Yang Z. 2011. Approximate likelihood calculation on a phylogeny for Bayesian estimation of divergence times. *Mol Biol Evol.* 28:2161–2172.
- dos Reis M, Yang Z. 2013. Why do more divergent sequences produce smaller nonsynonymous / synonymous rate ratios in pairwise sequence comparisons? *Genetics.* 195:195–204.
- dos Reis M, Zhu T, Yang Z. 2014. The impact of the rate prior on Bayesian estimation of divergence times with multiple loci. *Syst Biol.* 63:555–565.
- Shen XX et al. 2016. Enlarged multilocus data set provides surprisingly younger time of origin for the Plethodontidae, the largest family of salamanders. *Syst Biol.* 65:66–81.
- Soubrier J et al. 2012. The influence of rate heterogeneity among sites on the time dependence of molecular rates. *Mol Biol Evol.* 29:3345–3358.
- Stamatakis A. 2014. RAxML version 8: a tool for phylogenetic analysis and post-analysis of large phylogenies. *Bioinformatics.* 30:1312–1313.
- Subramanian S et al. 2009. High mitogenomic evolutionary rates and time dependency. *Trends Genet.* 25:482–486.
- Subramanian S, Lambert DM. 2011. Time dependency of molecular evolutionary Rates? yes and no. *Genome Biol Evol.* 3:1324–1328.
- Subramanian S, Lambert DM. 2012. Selective constraints determine the time dependency of

- molecular rates for human nuclear genomes. *Genome Biol Evol.* 4:1127–1132.
- Takahata N. 1987. On the overdispersed molecular clock. *Genetics.* 116:169–179.
- Takahata N. 2007. Molecular Clock: An Anti-neo-Darwinian Legacy. *Genetics.* 176:1–6.
- Talevich E, Invergo BM, Cock PJ, Chapman BA. 2012. Bio.Phylo: A unified toolkit for processing, analyzing and visualizing phylogenetic trees in Biopython. *BMC Bioinformatics.* 13:209.
- Thorne JL, Kishino H. 2002. Divergence time and evolutionary rate estimation with multilocus data. *Syst Biol.* 51:689–702.
- Thorne JL, Kishino H, Painter IS. 1998. Estimating the rate of evolution of the rate of molecular evolution. *Mol Biol Evol.* 15:1647–1657.
- Woodhams M. 2005. Can Deleterious Mutations Explain the Time Dependency of Molecular Rate Estimates? *Mol Biol Evol.* 23:2271–2273.
- Xia X, Xie Z, Salemi M, Chen L, Wang Y. 2003. An index of substitution saturation and its application. *Mol Phylogenet Evol.* 26:1–7.
- Yang Z. 2007. PAML 4: phylogenetic analysis by maximum likelihood. *Mol Biol Evol.* 24:1586–1591.
- Yang Z, Rannala B. 2006. Bayesian estimation of species divergence times under a molecular clock using multiple fossil calibrations with soft bounds. *Mol Biol Evol.* 23:212–226.
- Zheng Y, Peng R, Kuro-o M, Zeng X. 2011. Exploring patterns and extent of bias in estimating divergence time from mitochondrial DNA sequence data in a particular lineage: a case study of salamanders (order Caudata). *Mol Biol Evol.* 28:2521–2535.
- Zheng Y, Roberts RJ, Kasif S. 2004. Identification of genes with fast-evolving regions in

microbial genomes. *Nucleic Acids Res.* 32:6347–6357.

Zhu T, Dos Reis M, Yang Z. 2015. Characterization of the Uncertainty of Divergence Time Estimation under Relaxed Molecular Clock Models Using Multiple Loci. *Syst Biol.* 64:267–280.

Zuckerlandl E, Pauling L. 1965. Evolutionary divergence and convergence in proteins. In: Bryson V., Vogel H.J., editors. *Evolving Genes and Proteins*. New York: Academic Press. p. 97–166.



## Figure Legends

Figure 1. The 23 mammals and topology used for investigating the impact of purifying selection on species-level molecular dating.

Figure 2. The workflow of investigating the impact of purifying selection on species-level molecular dating.

Figure 3. The branch lengths of three representative bins. The branch lengths shown here were inferred from different codon positions of three representative bins “#1”, “#17” and “#30”, which are under the least, moderate and strongest selective constraints, respectively. The topology of each tree follows that of Fig. 2.

Figure 4. The change in the branch length as the selective constraint becomes stronger. The x-axis is the opposite of the mean pairwise  $dN/dS$  ( $-\omega$ ), indicating the overall selective constraint on a bin (the right is under the stronger constraint). At the upper, the y-axis is the ratio of the sum of terminal branch lengths to the sum of internal branch lengths ( $SumT/SumI$ ), indicating the overall relative length of terminal branches. At the lower, the y-axis is the ratio of the branch length of each terminal branch to the sum of internal branch lengths ( $T/SumI$ ), indicating the relative length of each terminal branch. Overall, as the selective constraint becomes stronger, the terminal branches are relatively extended. Such a change in the branch length can be detected for almost all the terminal branches.

Figure 5. The change in the time estimate as the selective constraint becomes stronger. The  $x$ -axis is the opposite of the mean pairwise  $dN/dS$  ( $-\omega$ ), indicating the overall selective constraint of a bin (the right is under the stronger constraint). The  $y$ -axis is the time estimate for each node. Overall, as the selective constraint becomes more rigid, the time estimates become older. The shallow-scale nodes are impacted more severely than deep nodes.

Figure 6. The change in the branch length and the time estimate when using all sites of genes. The patterns under two different partitioning schemes, concatenating all sites as one partition (1P) and partitioning by codon position (3P) are shown. The  $x$ -axis is the opposite of the mean pairwise  $dN/dS$  ( $-\omega$ ), indicating the overall selective constraint of a bin (the right is under the stronger constraint). At the upper, the  $y$ -axis is the ratio of the sum of terminal branch lengths to the sum of internal branch lengths ( $SumT/SumI$ ) based on all sites of genes. The linear regression shows a positive slope, however, it is the slope value is small, which suggests that when using all sites of genes, although the extension of the terminal branches can be detected, the extent is modest. At the lower, the  $y$ -axis is the time estimate for each node. Under the 1P scheme (blue), the difference in time estimates among bins were not prominent; the slope values of the linear regressions are generally small. However, under the 3P scheme (purple), the difference in time estimates among bins become prominent; the slope values of the linear regressions are much larger than under the 1P scheme. The impact of purifying selection on the time estimate under the 3P scheme is stronger than under the 1P scheme.

Figure 7. The comparison among different codon positions in randomly sampled genes. The upper panel shows the ratio of the sum of terminal branch lengths to the sum of internal branch lengths ( $SumT/SumI$ ) of the 1<sup>st</sup> position, 2<sup>nd</sup> position, 3<sup>rd</sup> position, 1<sup>st</sup> + 2<sup>nd</sup> positions and all sites for the 100 randomly sampled repeats (each of which includes 100 genes). In general, the  $SumT/SumI$  values are ranked as the 2<sup>nd</sup> position > 1<sup>st</sup> + 2<sup>nd</sup> positions > 1<sup>st</sup> position > all sites > 3<sup>rd</sup> position. The lower panel shows the mean time estimates of different codon positions for each node, which are also ranked as the 2<sup>nd</sup> position > 1<sup>st</sup> + 2<sup>nd</sup> positions > 1<sup>st</sup> position > all sites > 3<sup>rd</sup> position.

Figure 8. The expected effect of the time-dependency of molecular rates caused by purifying selection on branch lengths. Along the terminal branch, the "rate" undergoes a transition between the mutation rate ( $\mu$ ) and the substitution rate ( $s$ ). A. Under neutral conditions,  $s = \mu$ , the "rate" is uniform through time. B. In contrast, under purifying selection,  $s < \mu$ , the "rate" elevates along the terminal branch. In this case, the terminal branch would be extended relatively. When the time of a node is calibrated, the extended terminal branches could "push" the time estimates of its descendants to be older. C. As the selective constraint becomes stronger, the substitution rate becomes smaller, thus the extension of the terminal branches becomes more severe, leading to more serious overestimation.

Figure 1

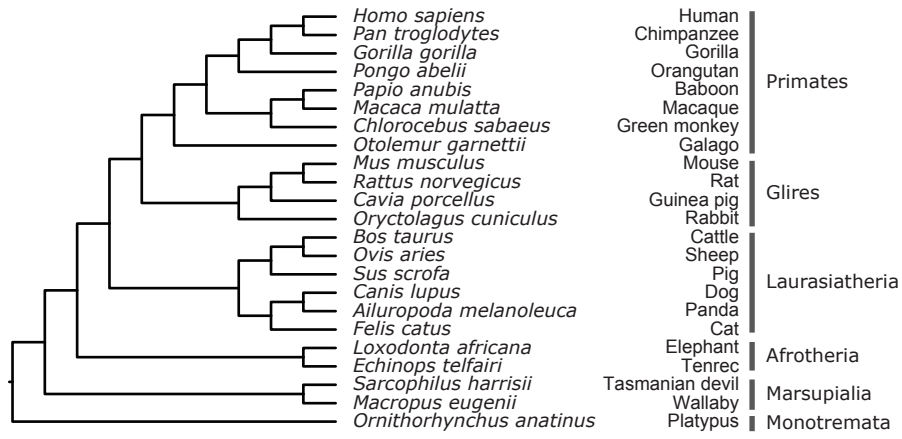

Figure 2

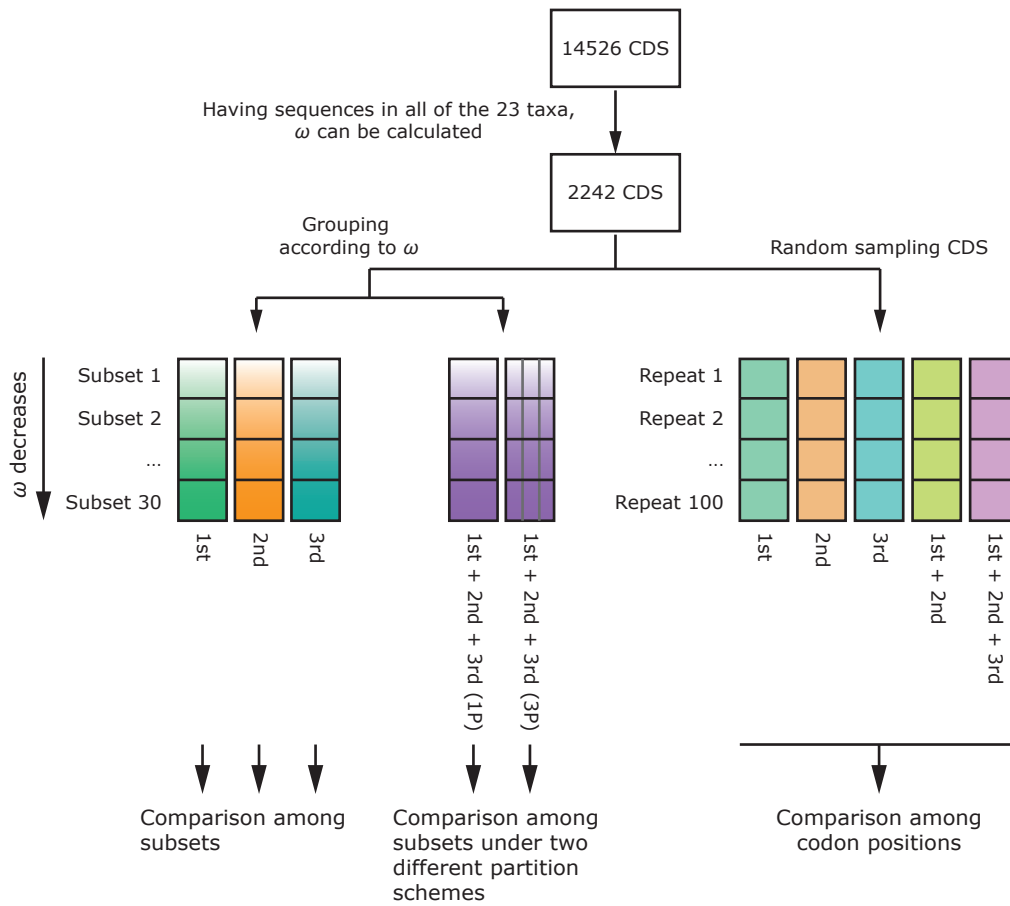

Figure 3

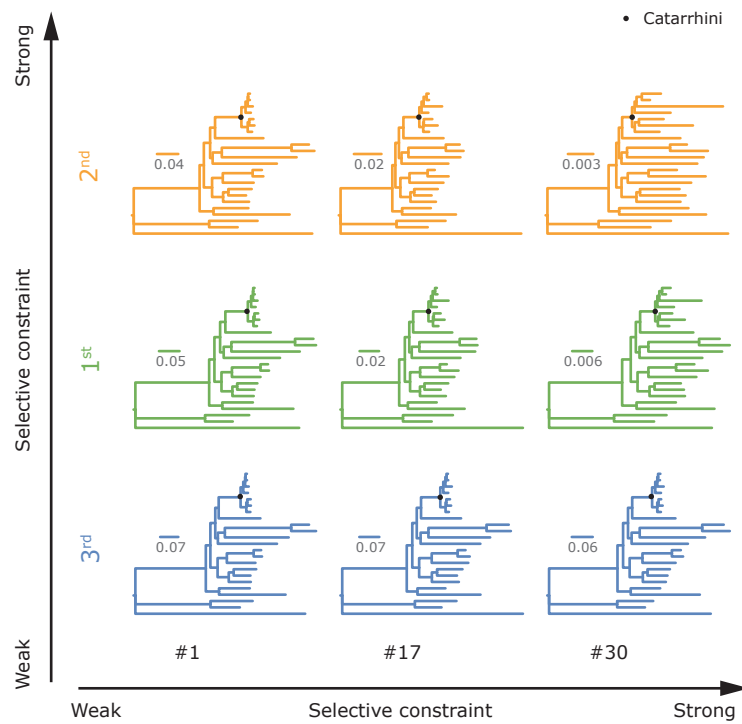

Figure 4

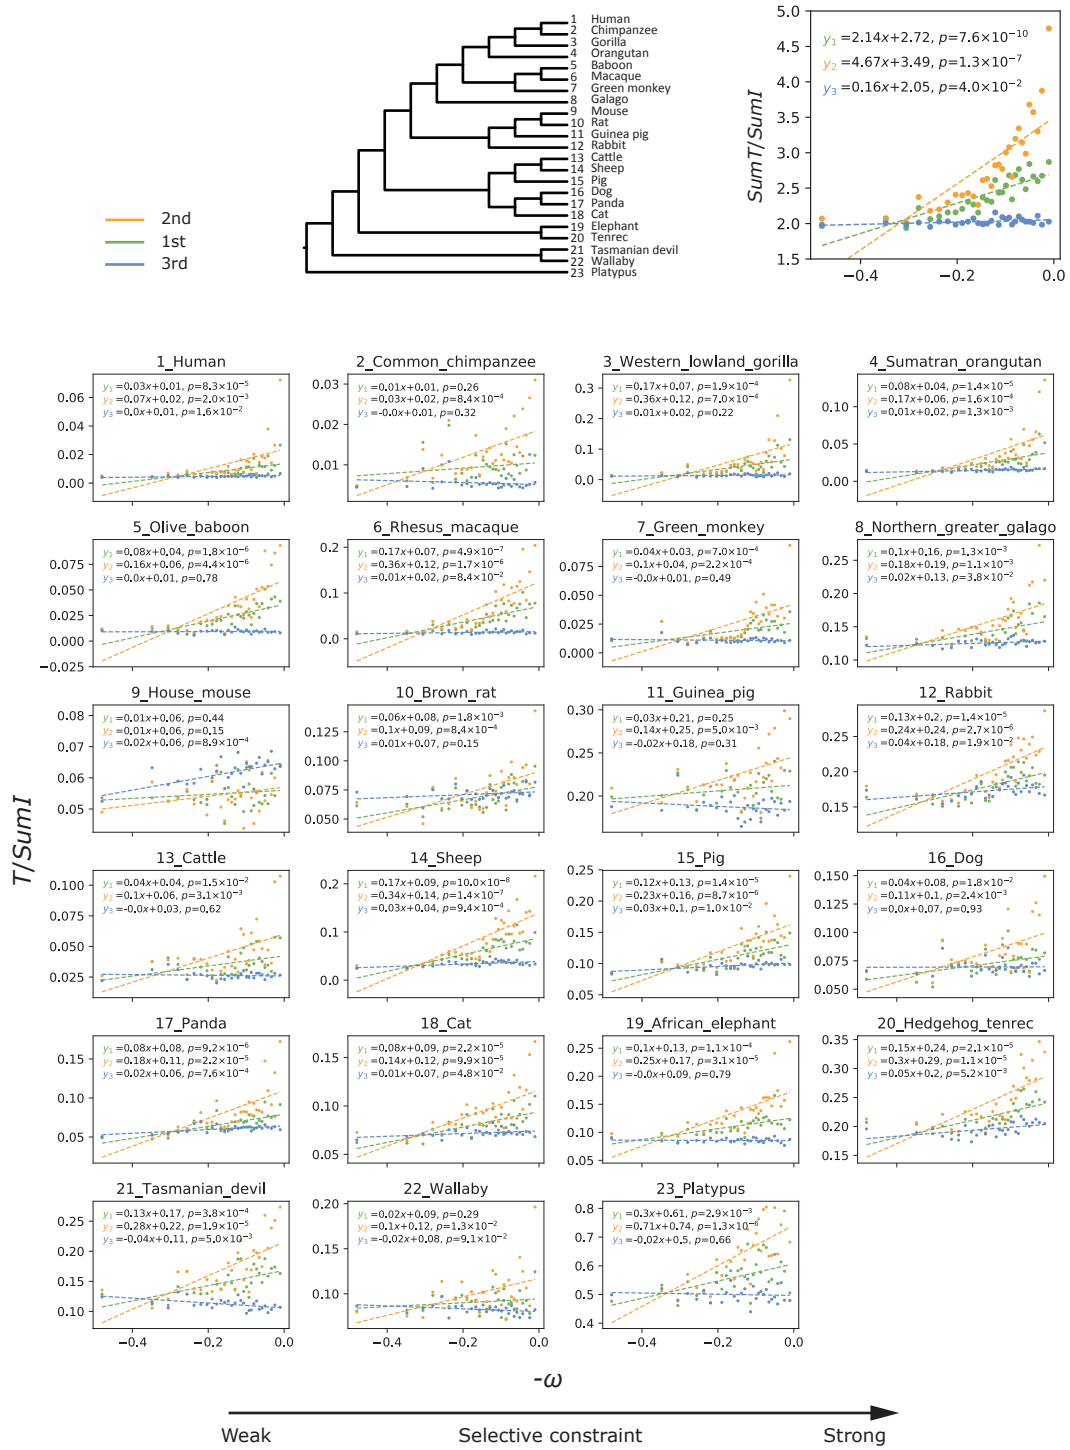

Figure 5

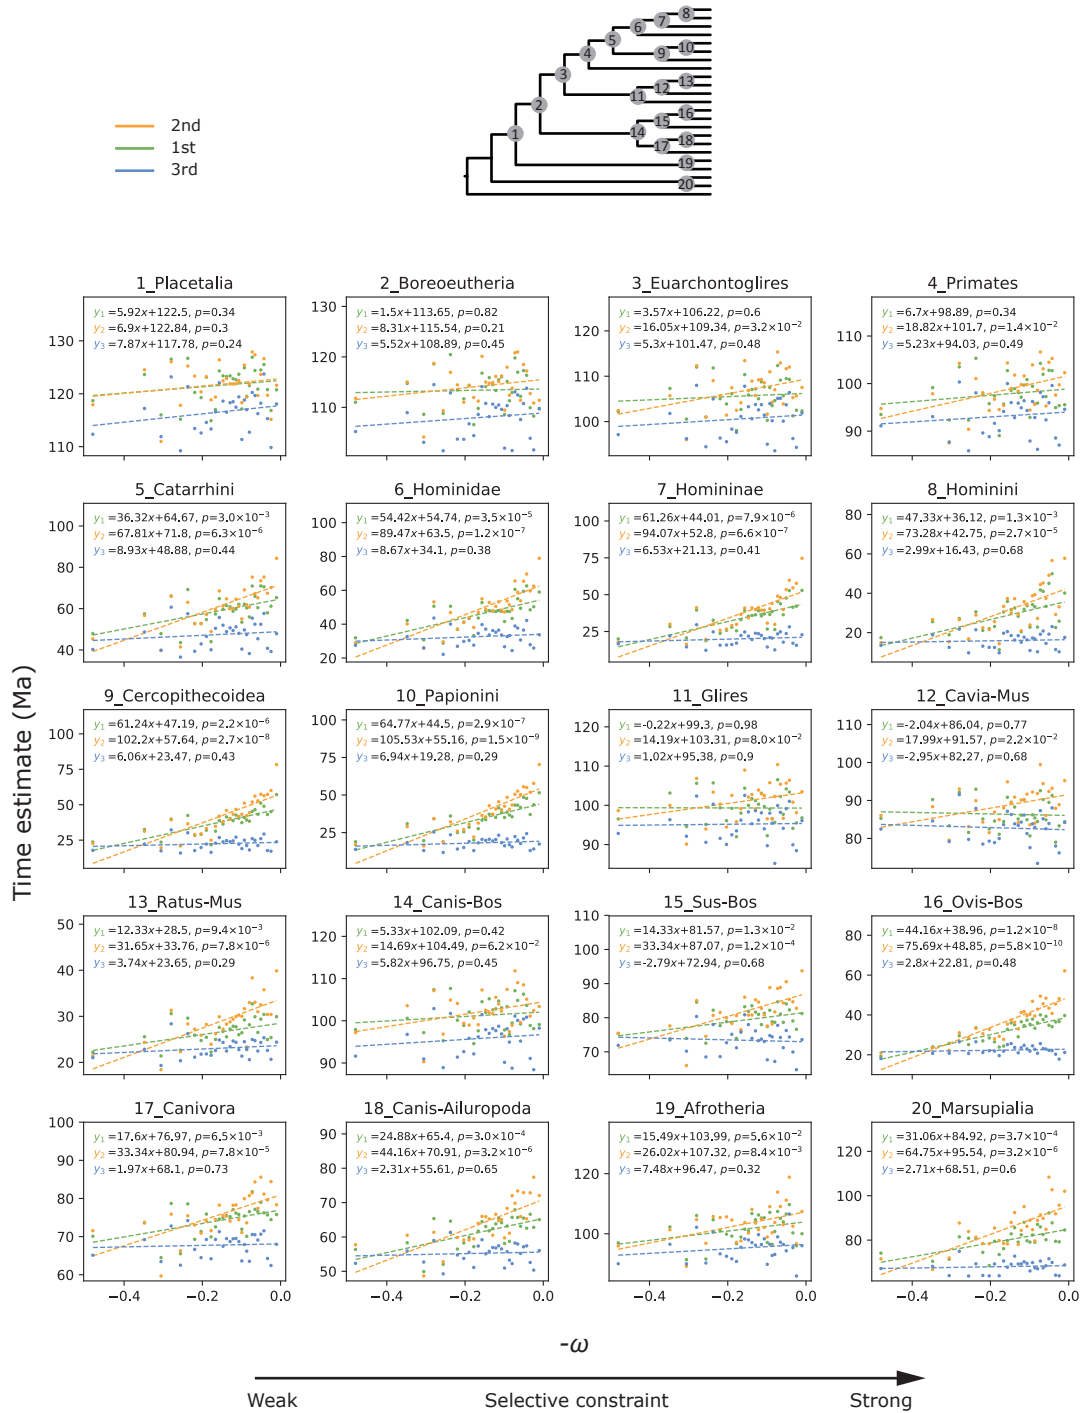



Figure 6

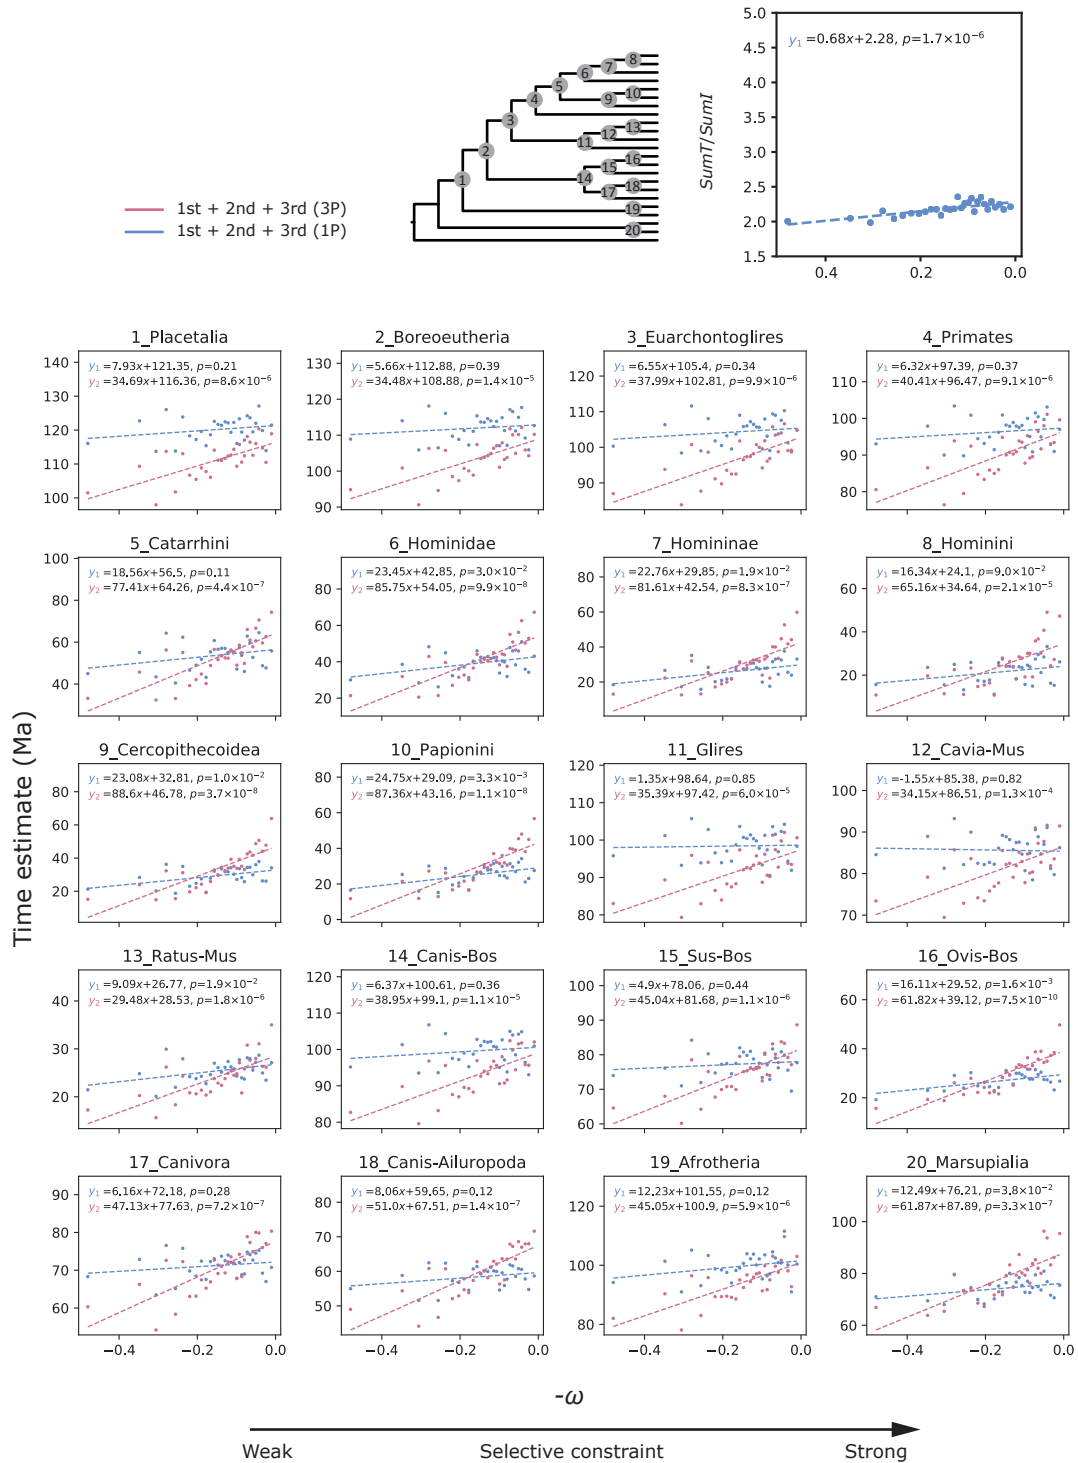

Figure 7

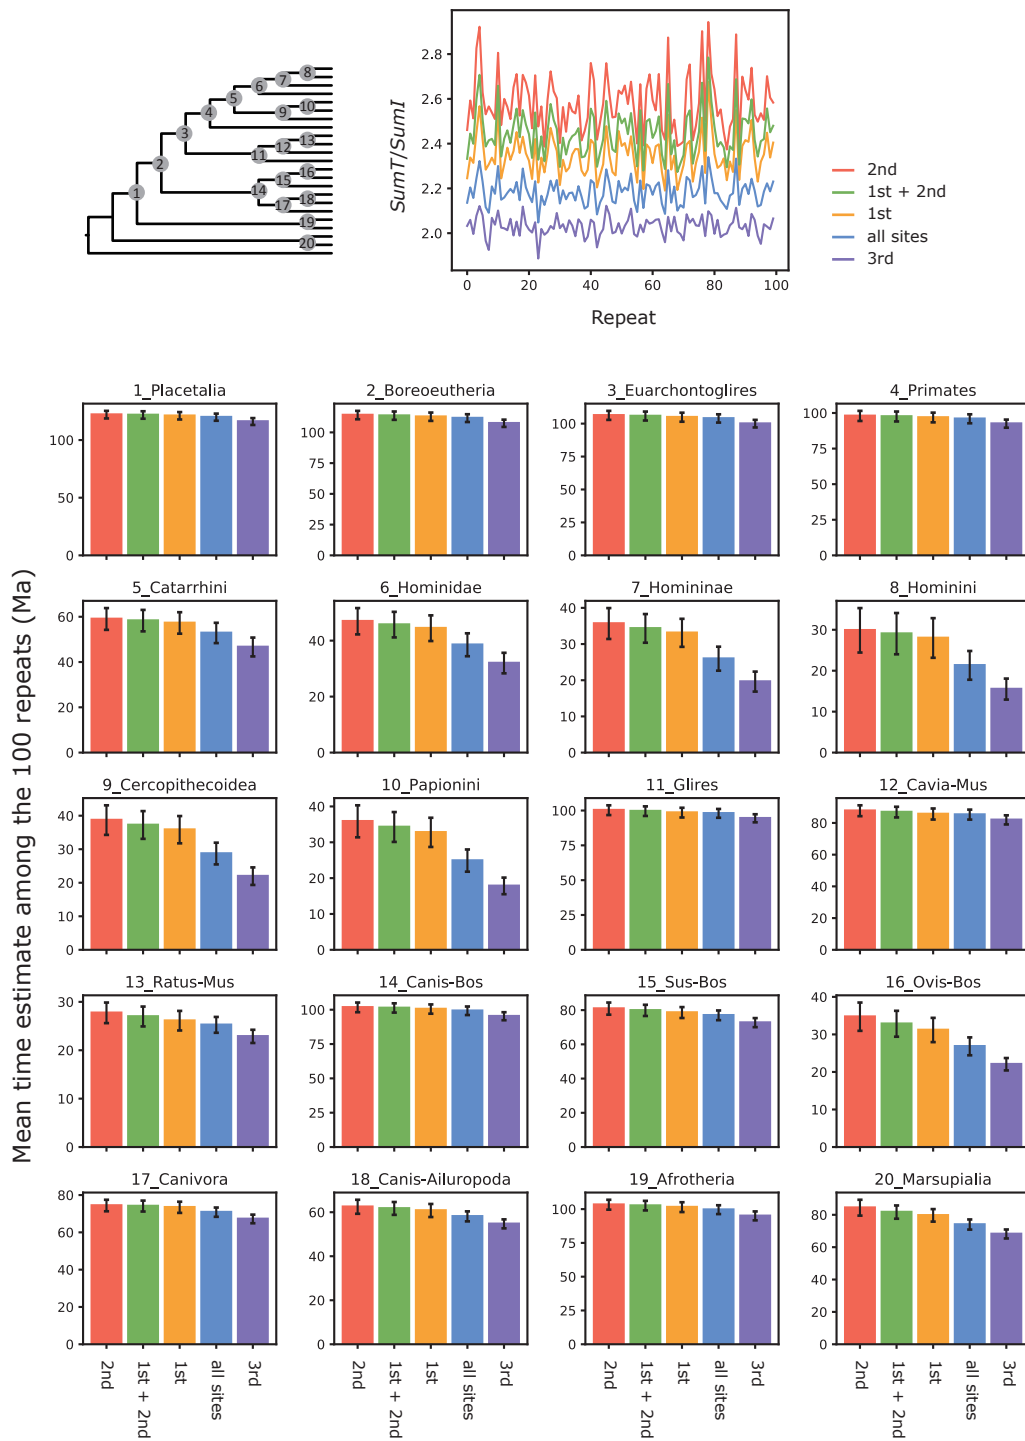

Figure 8

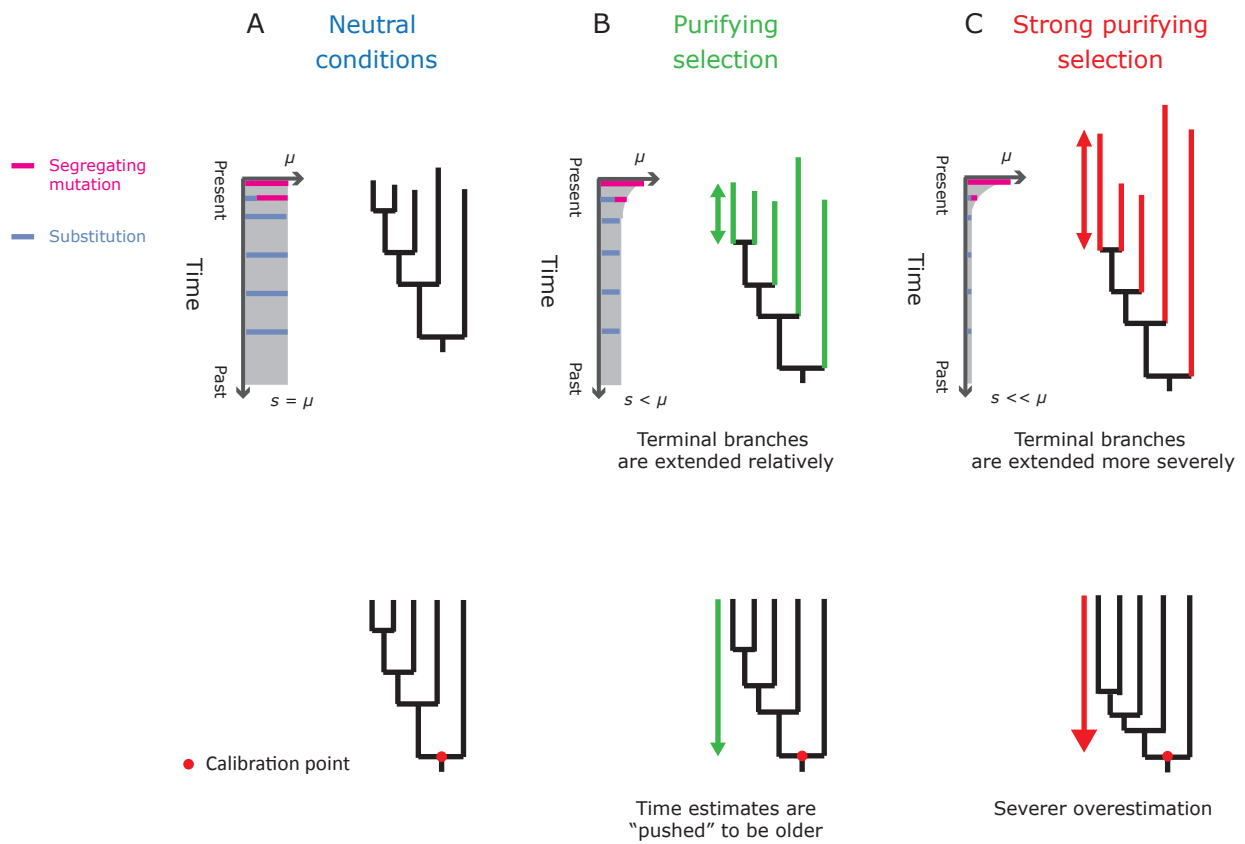

Source: http://biorxiv.org/content/10.1101/622209v1.full.pdf
